# Supplementary material
Source: PubMed Central journal article supplement (PMC3134135)
Supplement: NIHMS298861-supplement-Supp_Table_S1-3.pdf [file NIHMS298861-supplement-Supp_Table_S1-3.pdf]

**Supplemental Table 1. Statistical analysis of the top 25% cell size data in Table 2.**

|             | WT  | <i>topJ</i> | II-3 | III-4 | M6 | P24- |
|-------------|-----|-------------|------|-------|----|------|
| WT          | -   | ***         | ***  | ***   | ** | ns   |
| <i>topJ</i> | *** | -           | ns   | *     | ** | ***  |
| II-3        | *** | ns          | -    | *     | ** | ***  |
| III-4       | *** | *           | *    | -     | ** | ***  |
| M6          | **  | **          | **   | ***   | -  | ns   |
| P24-        | ns  | ***         | ***  | ***   | ns | -    |

\*,  $p \leq 0.05$

\*\* ,  $p \leq 0.01$

\*\*\*,  $p \leq 0.001$

ns, not significant

**Supplemental Table 2. Statistical analysis of the cell density data within the cell section range of 0.070-0.210  $\mu\text{m}^2$  in Table 2.**

|             | WT  | <i>topJ</i> | II-3 | III-4 | M6  | P24- |
|-------------|-----|-------------|------|-------|-----|------|
| WT          | -   | ***         | ns   | ***   | ns  | ns   |
| <i>topJ</i> | *** | -           | ***  | ns    | *** | ***  |
| II-3        | ns  | ***         | -    | ***   | ns  | ns   |
| III-4       | *** | ns          | ***  | -     | *** | *    |
| M6          | ns  | ***         | ns   | ***   | -   | ***  |
| P24-        | ns  | ***         | ns   | *     | *** | -    |

\*,  $p \leq 0.05$

\*\* ,  $p \leq 0.01$

\*\*\*,  $p \leq 0.001$

ns, not significant

**Supplemental Table 3. Statistical analysis of the protease accessibility data in Figures 5 and 6 at the indicated time points.**

One minute:

|                 | WT | J- | II-3 | III-4 | M6 | H9 | <i>topJΔHPD</i> | <i>topJΔC</i> | <i>topJΔAPR</i> |
|-----------------|----|----|------|-------|----|----|-----------------|---------------|-----------------|
| WT              | -  | ns | **   | **    | ** | ** | ns              | ns            | ns              |
| <i>topJ</i>     | ns | -  | **   | **    | ** | ** | ns              | ns            | ns              |
| II-3            | ** | ** | -    | **    | ns | ** | **              | *             | **              |
| III-4           | ** | ** | **   | -     | ** | ** | **              | **            | **              |
| M6              | ** | ** | ns   | **    | -  | ** | **              | **            | **              |
| H9              | ** | ** | **   | **    | ** | -  | **              | **            | **              |
| <i>topJΔHPD</i> | ns | ns | **   | **    | ** | ** | -               | ns            | ns              |
| <i>topJΔC</i>   | ns | ns | *    | **    | ** | ** | ns              | -             | ns              |
| <i>topJΔAPR</i> | ns | ns | **   | **    | ** | ** | ns              | ns            | -               |

Two minutes:

|                 | WT | J- | II-3 | III-4 | M6 | H9 | <i>topJΔHPD</i> | <i>topJΔC</i> | <i>topJΔAPR</i> |
|-----------------|----|----|------|-------|----|----|-----------------|---------------|-----------------|
| WT              | -  | ns | *    | **    | ** | ** | ns              | ns            | ns              |
| <i>topJ</i>     | ns | -  | **   | **    | ** | ** | ns              | *             | ns              |
| II-3            | *  | ** | -    | **    | ns | ** | **              | ns            | **              |
| III-4           | ** | ** | **   | -     | ** | ns | **              | **            | **              |
| M6              | ** | ** | ns   | **    | -  | ** | **              | **            | **              |
| H9              | ** | ** | **   | ns    | ** | -  | **              | **            | **              |
| <i>topJΔHPD</i> | ns | ns | **   | **    | ** | ** | -               | ns            | ns              |
| <i>topJΔC</i>   | ns | *  | ns   | **    | ** | ** | ns              | -             | ns              |
| <i>topJΔAPR</i> | ns | ns | **   | **    | ** | ** | ns              | ns            | -               |

Five minutes:

|                 | WT | J- | II-3 | III-4 | M6 | H9 | <i>topJΔHPD</i> | <i>topJΔC</i> | <i>topJΔAPR</i> |
|-----------------|----|----|------|-------|----|----|-----------------|---------------|-----------------|
| WT              | -  | ** | **   | **    | ** | ** | *               | ns            | ns              |
| <i>topJ</i>     | ** | -  | **   | **    | ** | ** | ns              | *             | ns              |
| II-3            | ** | ** | -    | **    | ** | ** | **              | **            | **              |
| III-4           | ** | ** | **   | -     | ns | ns | **              | **            | **              |
| M6              | ** | ** | **   | ns    | -  | ns | **              | **            | **              |
| H9              | ** | ** | **   | ns    | ns | -  | **              | **            | **              |
| <i>topJΔHPD</i> | *  | ns | **   | **    | ** | ** | -               | ns            | ns              |
| <i>topJΔC</i>   | ns | *  | **   | **    | ** | ** | ns              | -             | ns              |
| <i>topJΔAPR</i> | ns | ns | **   | **    | ** | ** | ns              | ns            | -               |

Ten minutes:

|                 | WT | J- | II-3 | III-4 | M6 | H9 | <i>topJΔHPD</i> | <i>topJΔC</i> | <i>topJΔAPR</i> |
|-----------------|----|----|------|-------|----|----|-----------------|---------------|-----------------|
| WT              | -  | ** | **   | **    | ** | ** | ns              | ns            | *               |
| <i>topJ</i>     | ** | -  | **   | **    | ** | ** | ns              | **            | ns              |
| II-3            | ** | ** | -    | **    | ** | ** | **              | **            | **              |
| III-4           | ** | ** | **   | -     | ns | ns | **              | **            | **              |
| M6              | ** | ** | **   | ns    | -  | ns | **              | **            | **              |
| H9              | ** | ** | **   | ns    | ns | -  | **              | **            | **              |
| <i>topJΔHPD</i> | ns | ns | **   | **    | ** | ** | -               | ns            | ns              |
| <i>topJΔC</i>   | ns | ** | **   | **    | ** | ** | ns              | -             | ns              |
| <i>topJΔAPR</i> | *  | ns | **   | **    | ** | ** | ns              | ns            | -               |

Twenty minutes:

|                 | WT | J- | II-3 | III-4 | M6 | H9 | <i>topJΔHPD</i> | <i>topJΔC</i> | <i>topJΔAPR</i> |
|-----------------|----|----|------|-------|----|----|-----------------|---------------|-----------------|
| WT              | -  | ** | **   | **    | ** | ** | **              | *             | **              |
| <i>topJ</i>     | ** | -  | **   | **    | ** | ** | ns              | **            | ns              |
| II-3            | ** | ** | -    | **    | *  | ** | **              | **            | **              |
| III-4           | ** | ** | **   | -     | ns | ns | **              | **            | **              |
| M6              | ** | ** | *    | ns    | -  | ns | **              | **            | **              |
| H9              | ** | ** | **   | ns    | ns | -  | **              | **            | **              |
| <i>topJΔHPD</i> | ** | ns | **   | **    | ** | ** | -               | ns            | ns              |
| <i>topJΔC</i>   | *  | ** | **   | **    | ** | ** | ns              | -             | ns              |
| <i>topJΔAPR</i> | ** | ns | **   | **    | ** | ** | ns              | ns            | -               |

Thirty minutes:

|                 | WT | J- | II-3 | III-4 | M6 | H9 | <i>topJΔHPD</i> | <i>topJΔC</i> | <i>topJΔAPR</i> |
|-----------------|----|----|------|-------|----|----|-----------------|---------------|-----------------|
| WT              | -  | *  | **   | **    | ** | ** | ns              | ns            | ns              |
| <i>topJ</i>     | *  | -  | **   | **    | ** | ** | ns              | ns            | ns              |
| II-3            | ** | ** | -    | ns    | ns | ns | **              | **            | **              |
| III-4           | ** | ** | ns   | -     | ns | ns | **              | **            | **              |
| M6              | ** | ** | ns   | ns    | -  | ns | **              | **            | **              |
| H9              | ** | ** | ns   | ns    | ns | -  | **              | **            | **              |
| <i>topJΔHPD</i> | ns | ns | **   | **    | ** | ** | -               | ns            | ns              |
| <i>topJΔC</i>   | ns | ns | **   | **    | ** | ** | ns              | -             | ns              |
| <i>topJΔAPR</i> | ns | ns | **   | **    | ** | ** | ns              | ns            | -               |

ns, not significant

\*,  $p \leq 0.05$

\*\* ,  $p \leq 0.01$
